# Supplementary material for: Highly dispersed nanodiamonds supported on few-layer graphene as robust metal-free catalysts for ethylbenzene dehydrogenation reaction
Source: Royal Society of Chemistry journal article supplement (doi:10.1039/c5cy01213a), 2015-01-01
Supplement: c5cy01213a1.pdf [file c5cy01213a1.pdf]

### Support Information

## **Highly dispersed nanodiamonds supported on few-layer graphene as robust metal free catalysts for ethylbenzene dehydrogenation reaction**

Jiangyong Diao,<sup>a</sup> Hongyang Liu,<sup>a\*</sup> Zhenbao Feng,<sup>a</sup> Yajie Zhang,<sup>a</sup> Tong Chen,<sup>b</sup> Changxi Miao,<sup>b</sup> Weimin Yang<sup>b\*</sup> and Dangsheng Su<sup>a\*</sup>

<sup>a</sup> Shenyang National Laboratory for Materials Science, Institute of Metal Research, Chinese Academy of Sciences, Shenyang 110016, China. Fax: +86 2483970019; Tel: +86 2423971577

<sup>b</sup> Sinopec Shanghai Research Institute of Petrochemical Technology, 1658 Pudong Beilu, Shanghai, China. Fax: +862168462283; Tel: +862168462824.

E-mail: [liuhy@imr.ac.cn](mailto:liuhy@imr.ac.cn), [yangwm.sshy@sinopec.com](mailto:yangwm.sshy@sinopec.com), [dssu@imr.ac.cn](mailto:dssu@imr.ac.cn)

## **Experimental information:**

### Synthesis of highly dispersed ND nanoaggregates

The highly dispersed ND nanoaggregates was synthesized by a milling process of commercial ND powders reported by Osawa et al.<sup>1</sup> 2 g commercial ND powder was added a small mill equipped with a 15 mL zirconia vessel and a single-bladed zirconia agitator were used for the stirred media-milling. Zirconia beads of 30  $\mu\text{m}$  in diameter were employed. The mill was tightly closed with cover, and the content agitated at a peripheral speed of  $10\text{ m s}^{-1}$  for 3 h under cooling with running water. At the end of milling, beads were separated by filtration and/or centrifugation and the slurry diluted with water to 0.2% concentration and subjected to sonication to obtain a clear colloidal solution of highly dispersed ND nanoaggregates.

### Synthesis of HD-ND/graphene catalysts:

The commercial few-layer graphene support bought from the Sixth Element Company (Changzhou, China) were dispersed into ethanol by sonication. Then the as-prepared HD-ND nanoaggregates colloidal solution was added into the graphene ethanol solution. After stirring for 10 h, the solvent was removed by vacuum rotary evaporation at  $40\text{ }^{\circ}\text{C}$  and the obtained precipitate was dried at  $120\text{ }^{\circ}\text{C}$  overnight. The HD-ND/graphene catalysts with different ND weight loadings can be synthesized by tuning the concentration of ND in the initial solution.

### Characterization and Catalytic performance test:

The samples were characterized by SEM (Nova NanoSEM 450, FEI). The images of transmission electron microscopy (TEM) were observed on a Tecnai G2 F20 operated at 200 kV. X-ray diffraction (XRD) patterns of the samples were obtained using a D/MAX-2500 PC X-ray diffractometer with monochromatized Cu K $\alpha$  radiation ( $\lambda=1.54\text{ \AA}$ ). Raman spectroscopy was tested by a LabRam HR 800 using a 632.8 nm laser. The catalytic tests were carried out for the commercial ND powder, HD-ND/graphene catalysts and the pure graphene with the DH of ethylbenzene to styrene. The experiments were tested using 50 mg catalysts at  $550\text{ }^{\circ}\text{C}$  in a fixed-bed quartz reactor. The mixture reactants were introduced to the reactor with a total flow rate of  $10\text{ mL min}^{-1}$  (2.6 % ethylbenzene) at atmospheric pressure for 20 h. The

helium was used as a balance gas. The reaction product was analyzed by gas chromatography (Agilent 7890A) with FID and TCD detectors. EB conversion of the blank experiment was just 0.12%, which was ignored here.

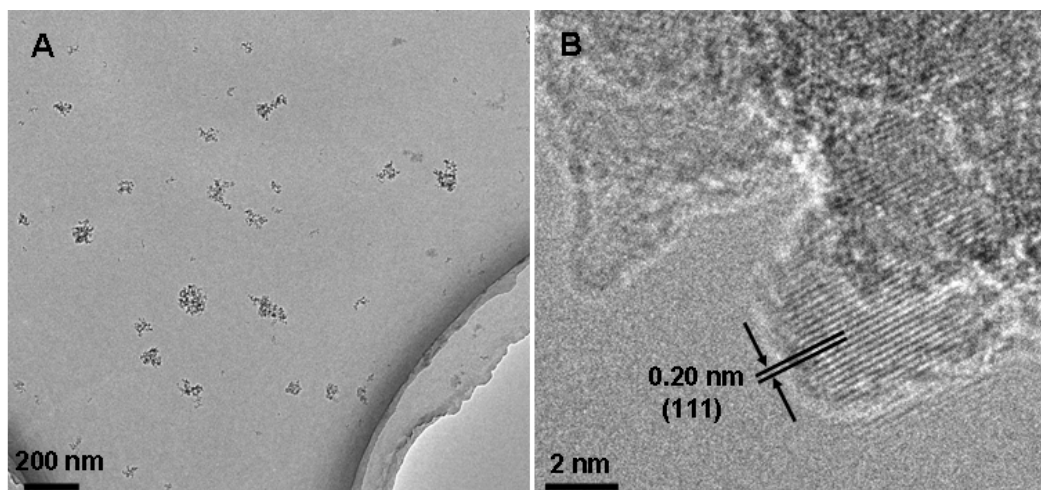

**Fig. S1** TEM images of the (A) commercial ND aggregates collected after sonicating in water and the HRTEM image of (B) one single HD-ND nanoparticle.

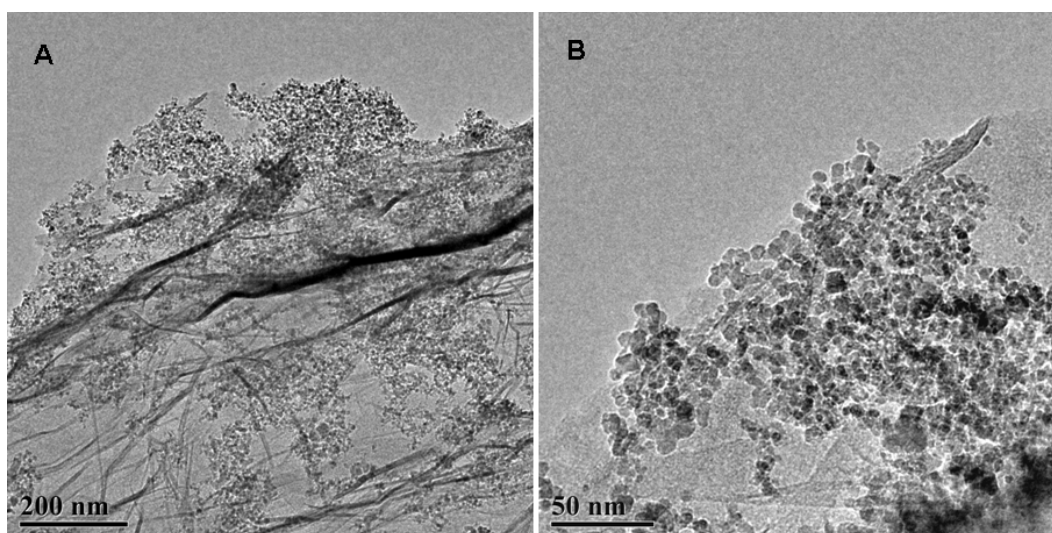

**Fig. S2** TEM images of the HD-ND/graphene catalyst. The weight loading of ND is 12 wt%.

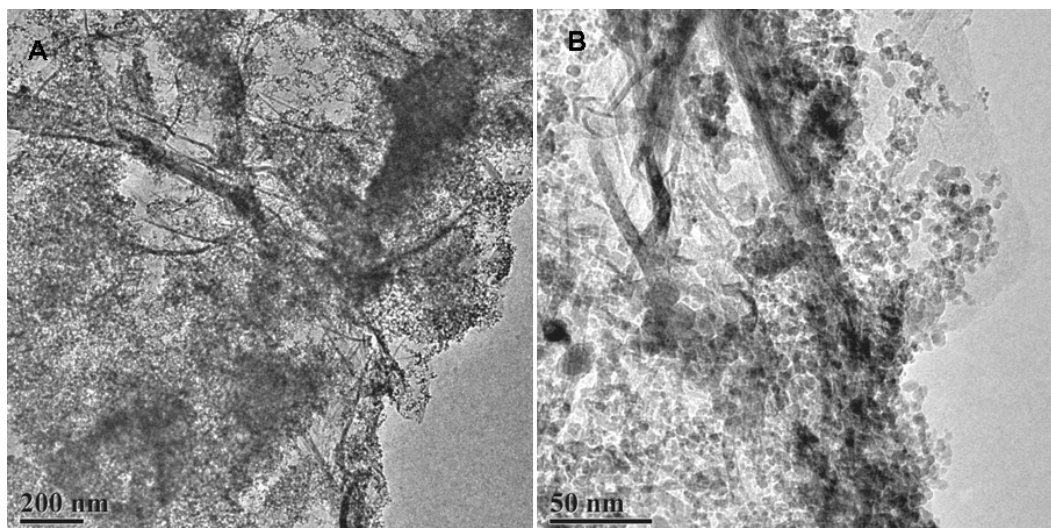

**Fig. S3** TEM images of the HD-ND/graphene catalyst. The weight loading of ND is 30 wt%.

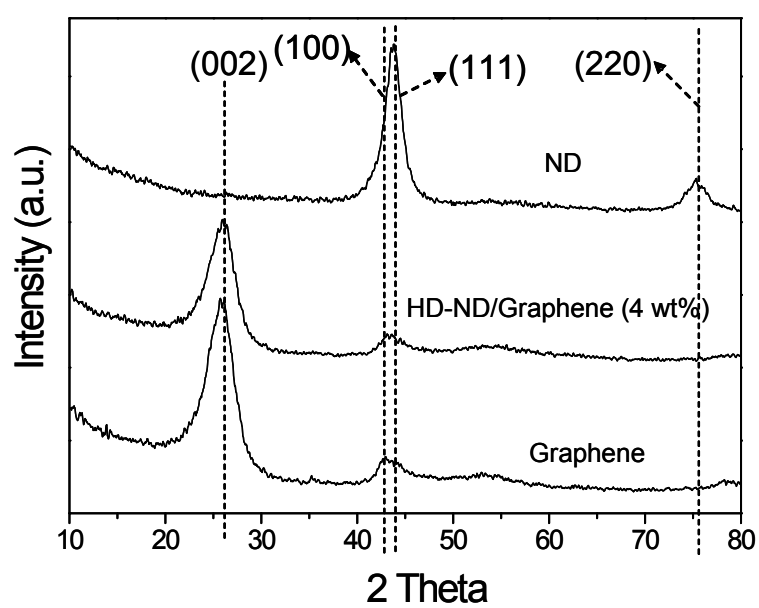

**Fig. S4** XRD patterns of the commercial ND powders, HD-ND/graphene (4 wt%) and the pure graphene support.

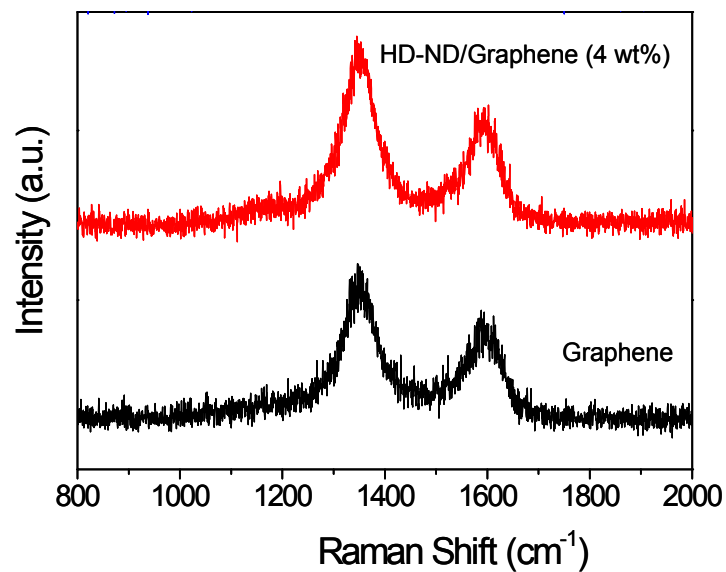

**Fig. S5** Raman spectra of the graphene support and HD-ND/graphene (4 wt%) catalyst.

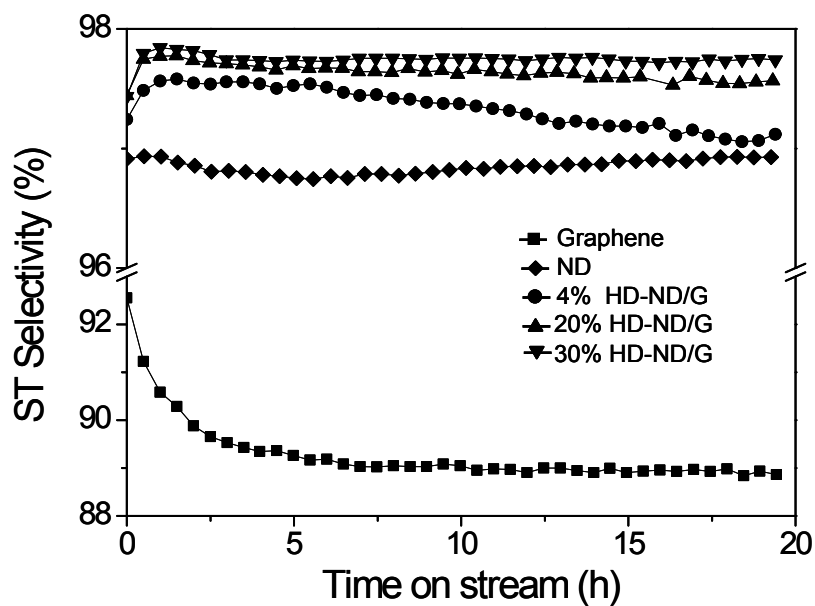

**Fig. S6** Catalytic performance over few-layer graphene, HD-ND/graphene catalysts with different ND weight loading (4 wt%, 12 wt%, 30 wt%) and commercial ND powders. Reaction conditions: T = 550 °C, Flow rate = 10 ml min<sup>-1</sup>, 2.6% ethylbenzene with He balance.

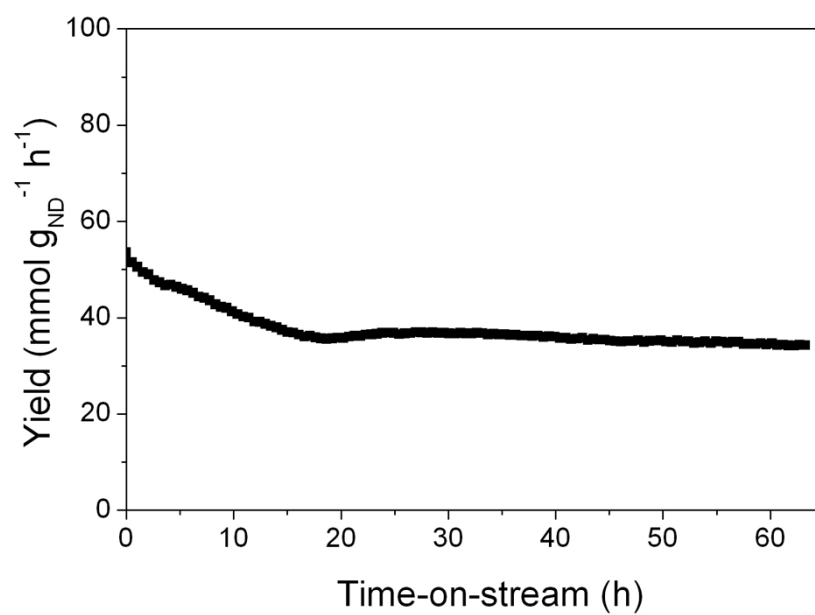

**Fig. S7** The long term test over the HD-ND/graphene catalysts with 4% ND weight loading. Reaction conditions: T = 550 °C, Flow rate = 10 ml min<sup>-1</sup>, 2.6% ethylbenzene with He balance.

## References

- 1 A. Krüger, F. Kataoka, E. Osawa, Carbon, 2005, **43**, 1722.
